# Supplementary material
Source: MDPI journal article supplement (https://www.mdpi.com/2227-9040/10/11/483)
Supplement: s1 [file s1]

# Optimizing the Heavy Metal Ion Sensing Properties of Functionalized Silver Nanoparticles: The Role of Surface Coating Density

Andrea Rossi <sup>1</sup>, Massimiliano Cuccioloni <sup>2,\*</sup>, Lisa Rita Magnaghi <sup>3</sup>, Raffaella Biesuz <sup>3</sup>, Marco Zannotti <sup>1,\*</sup>, Laura Petetta <sup>1</sup>, Mauro Angeletti <sup>2</sup> and Rita Giovannetti <sup>1</sup>

<sup>1</sup> School of Science and Technology, Chemistry Division, University of Camerino, 62032 Camerino, Italy

<sup>2</sup> School of Biosciences and Veterinary Medicine, University of Camerino, 62032 Camerino, Italy

<sup>3</sup> Department of Chemistry, University of Pavia, Viale Taramelli 12, 27100 Pavia, Italy

\* Correspondence: massimiliano.cuccioloni@unicam.it (M.C.); marco.zannotti@unicam.it (M.Z.); Tel.: +39-0373-403247 (M.C.)

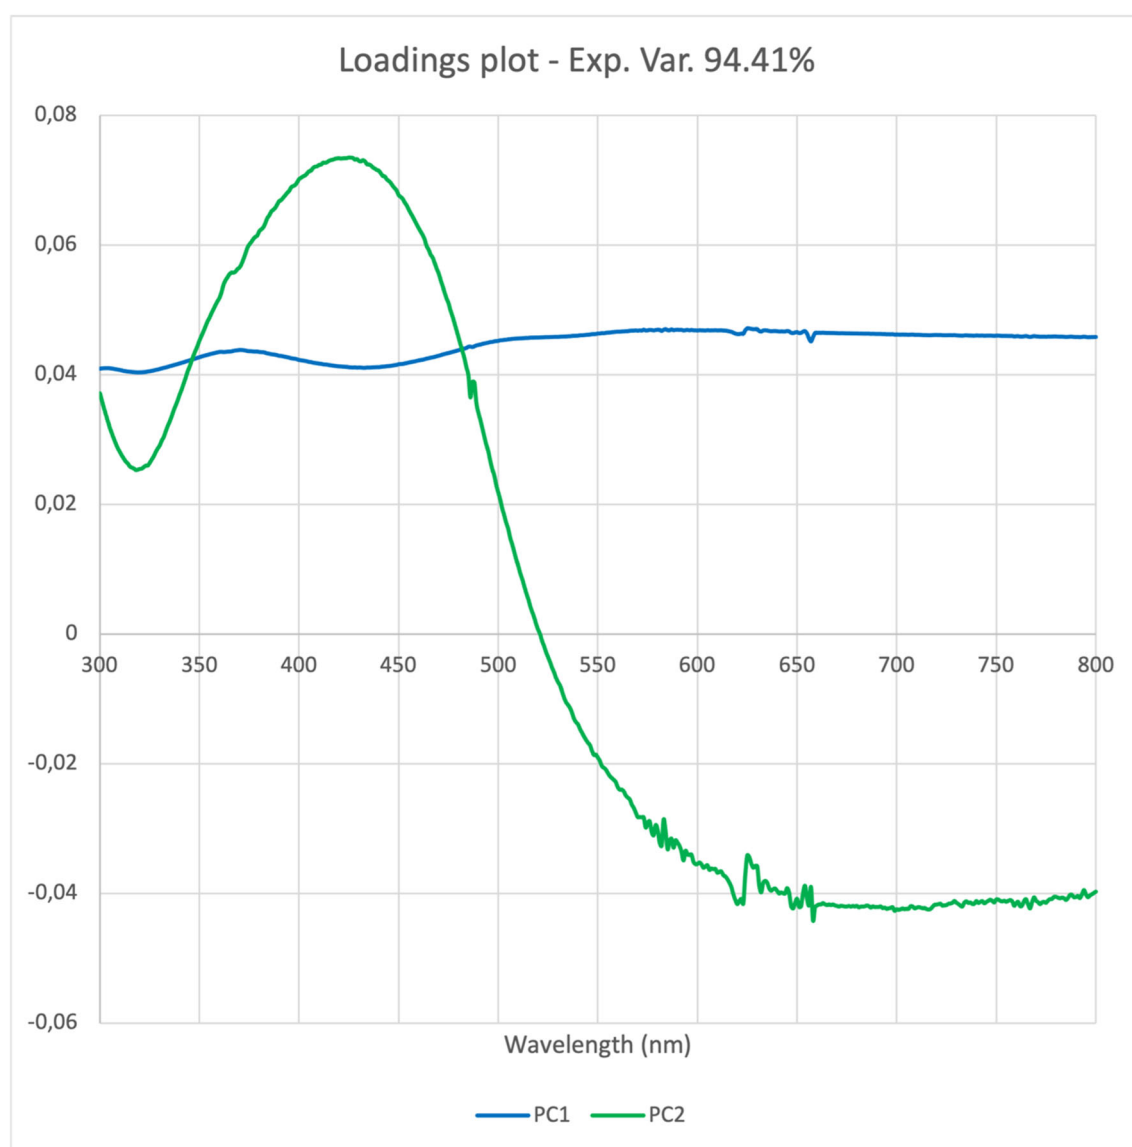

**Figure S1.** Loading plot for ML-AgNPs@11MUA

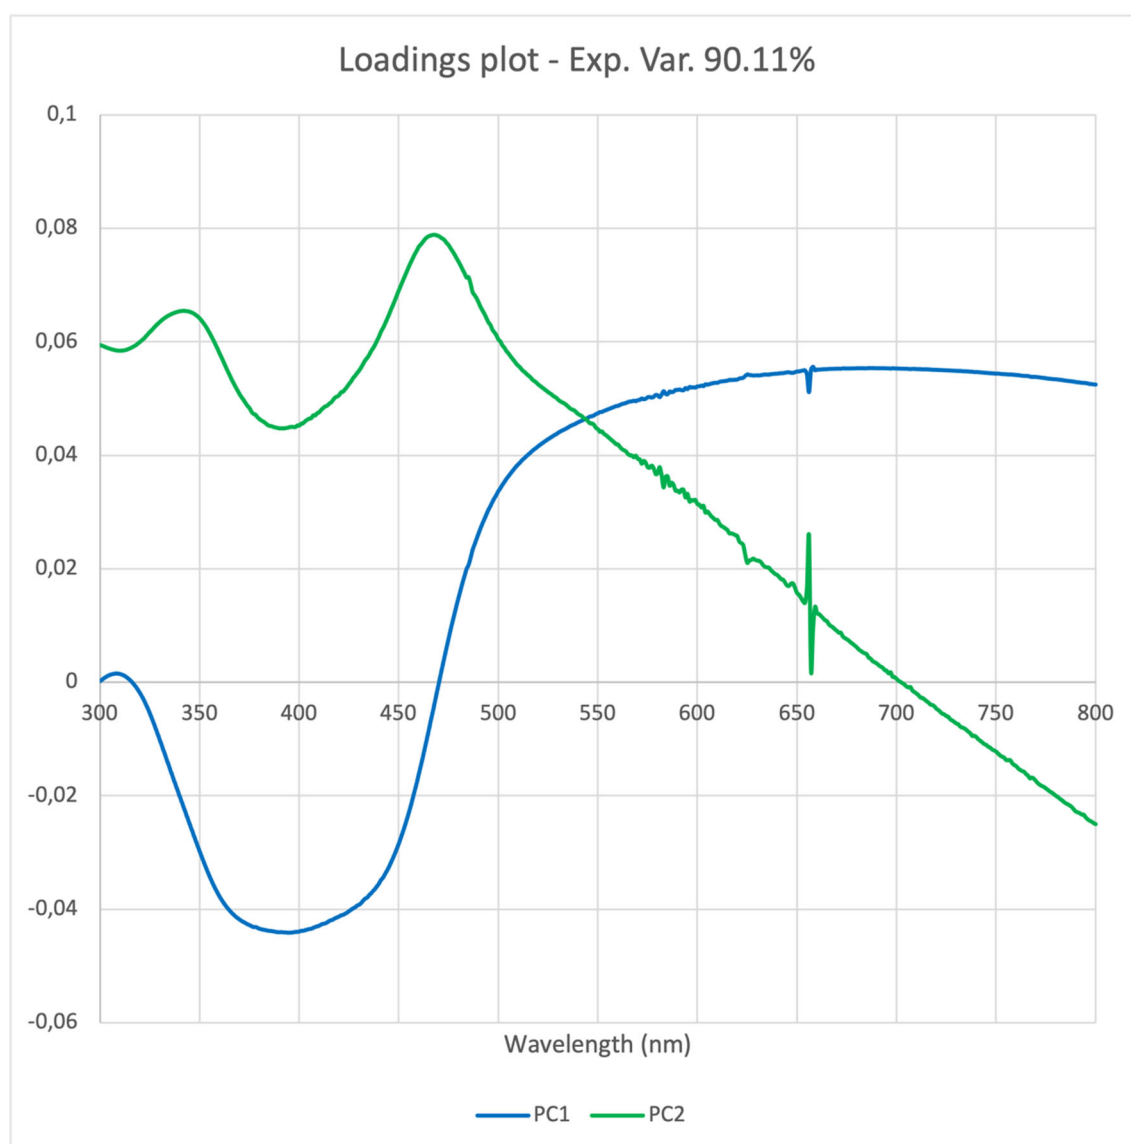

**Figure S2.** Loading plot for FL-AgNPs@11MUA

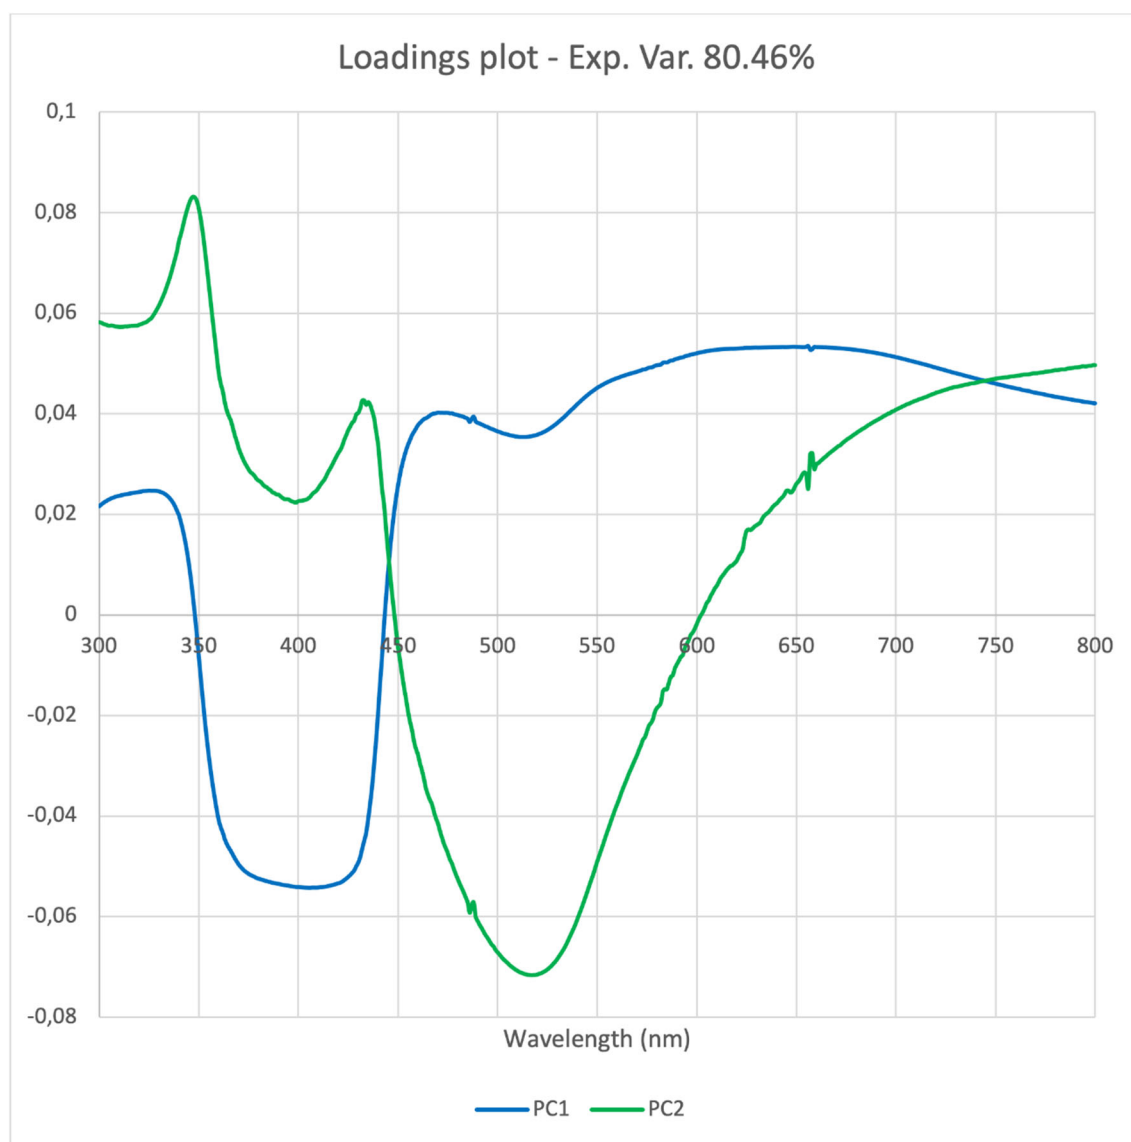

**Figure S3.** Loading plot for PL<sub>1</sub>-AgNPs@11MUA

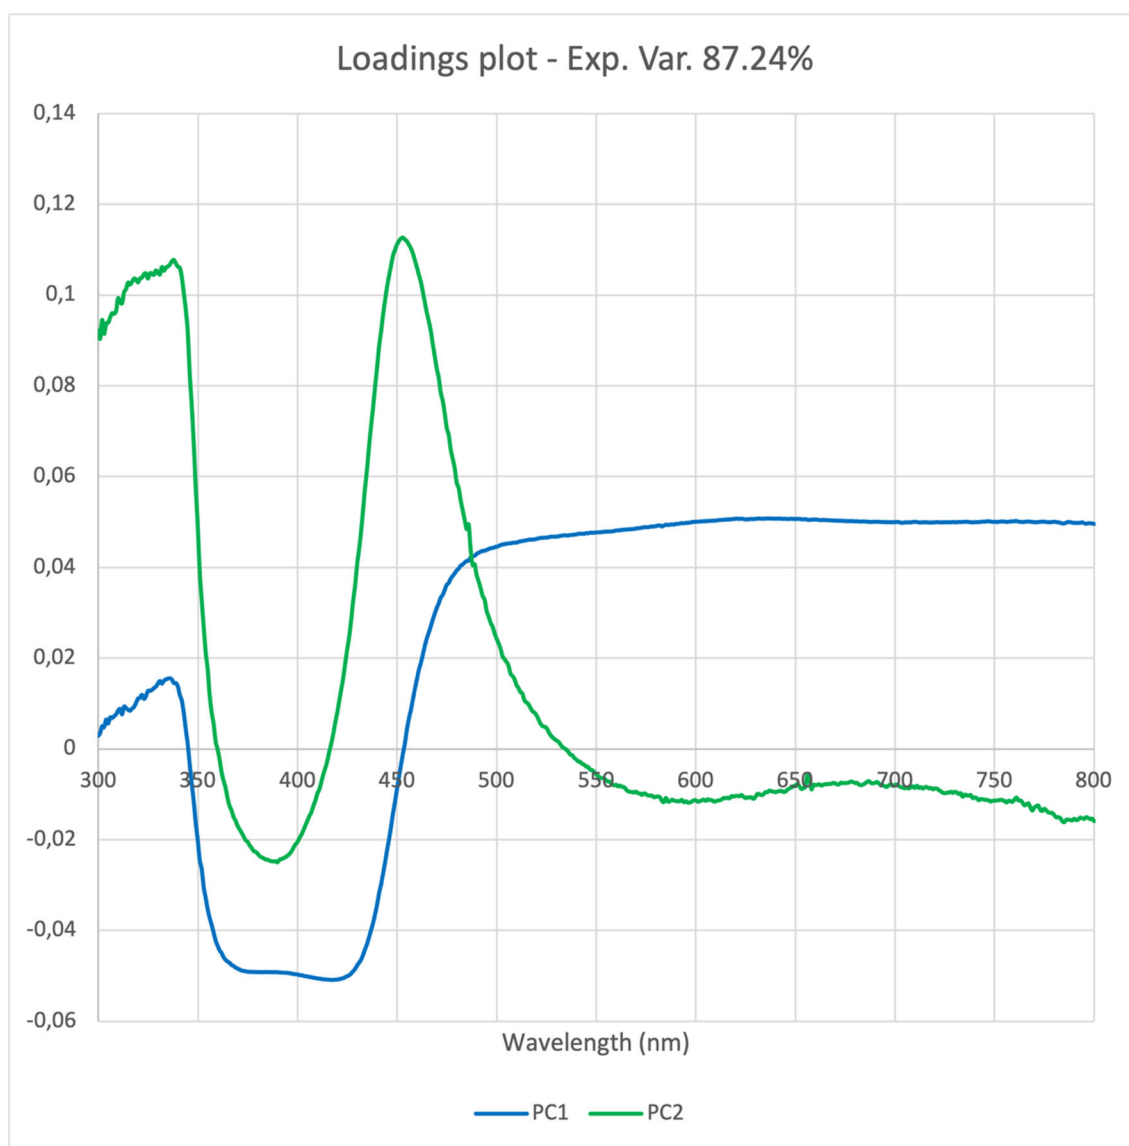

**Figure S4.** Loading plot for PL<sub>2</sub>-AgNPs@11MUA

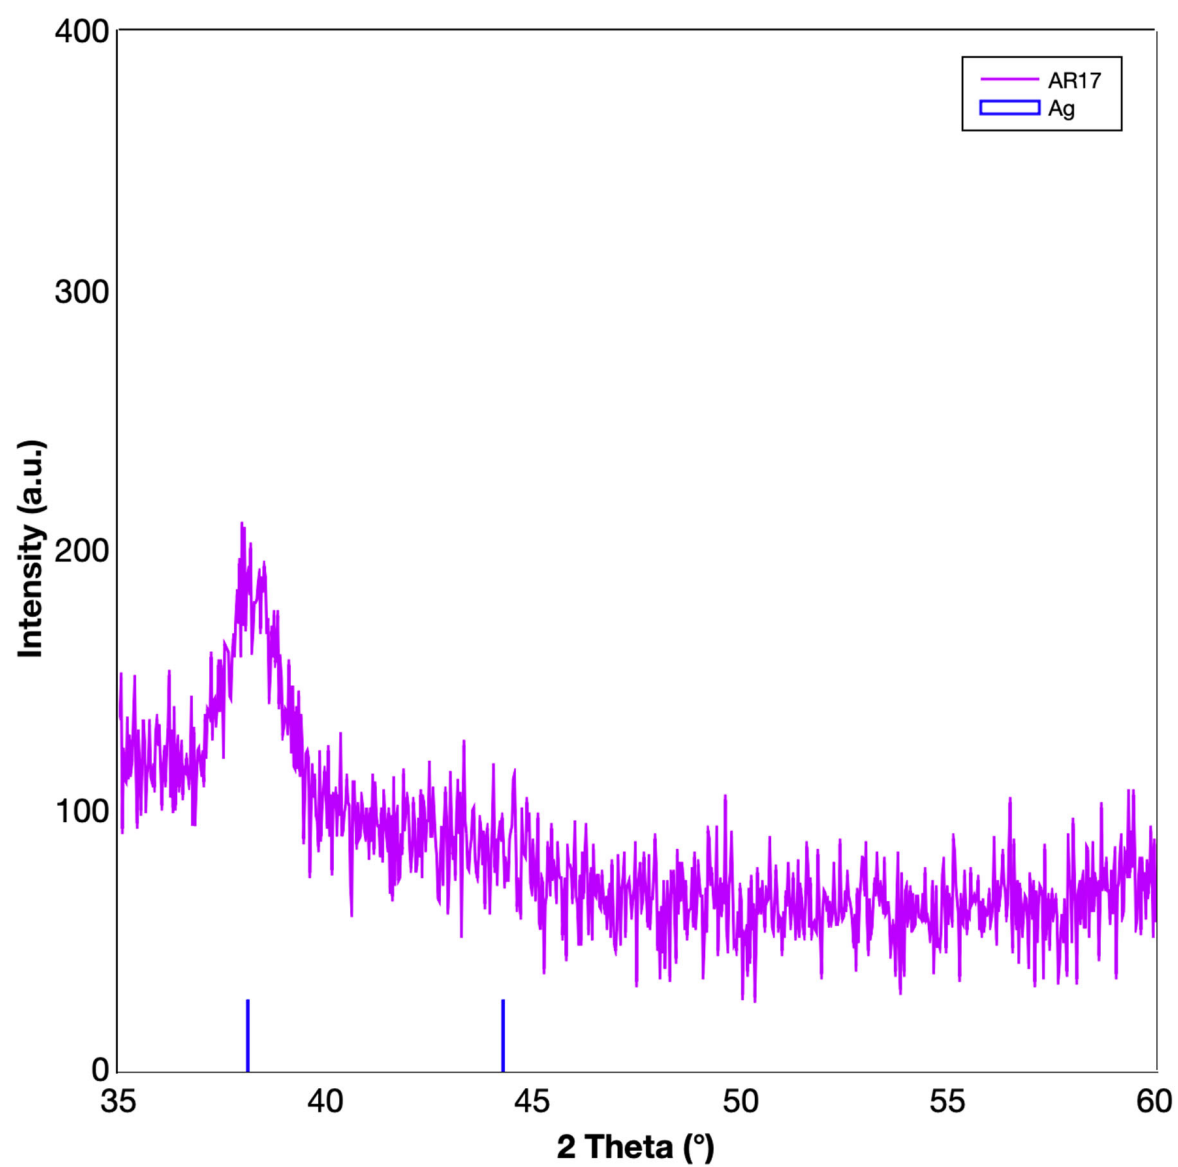

**Figure S5.** XRD spectrum of AgNPs.
